# Supplementary material
Source: PubMed Central journal article supplement (PMC8852362)
Supplement: NIHMS1770285-supplement-supinfo.pdf [file NIHMS1770285-supplement-supinfo.pdf]

## Mitochondria modulate ameloblast Ca<sup>2+</sup> signaling

Veronica Costiniti<sup>1</sup>, Guilherme H. S. Bomfim<sup>1</sup>, Maria Neginskaya<sup>1</sup>, Ga-Yeon Son<sup>1</sup>, Erna Mitaishvili<sup>1</sup>, Marta Giacomello<sup>2,3</sup>, Evgeny Pavlov<sup>1</sup>, Rodrigo S. Lacruz<sup>1</sup>

<sup>1</sup> Department of Molecular Pathobiology, New York University College of Dentistry, New York, USA

<sup>2</sup> Department of Biology, University of Padova, Padua, Italy

<sup>3</sup> Department of Biomedical Sciences, University of Padova, Padua, Italy

### SUPPLEMENTARY MATERIALS:

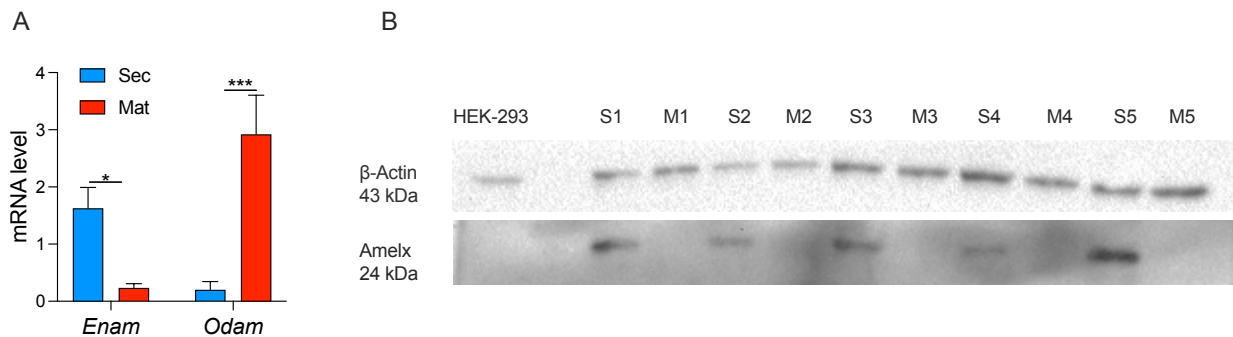

**Figure S1: Secretory and maturation stage sample purity.** **A)** mRNA levels of *Enam* (a marker for secretory stage) and *Odam* (*Odam*) (a marker for maturation stage) were quantified by RT-qPCR (n = 6 animals). Data were analyzed by one-way ANOVA and 2 - tailed unpaired Student's t test. \*P < 0.05, \*\*\*P < 0.001. **B)** Western blot analysis for the enamel specific protein AMELX that is highly expressed in secretory ameloblasts. HEK-293 cells were used as negative control as they do not express AMELX. (n = 12 animals).

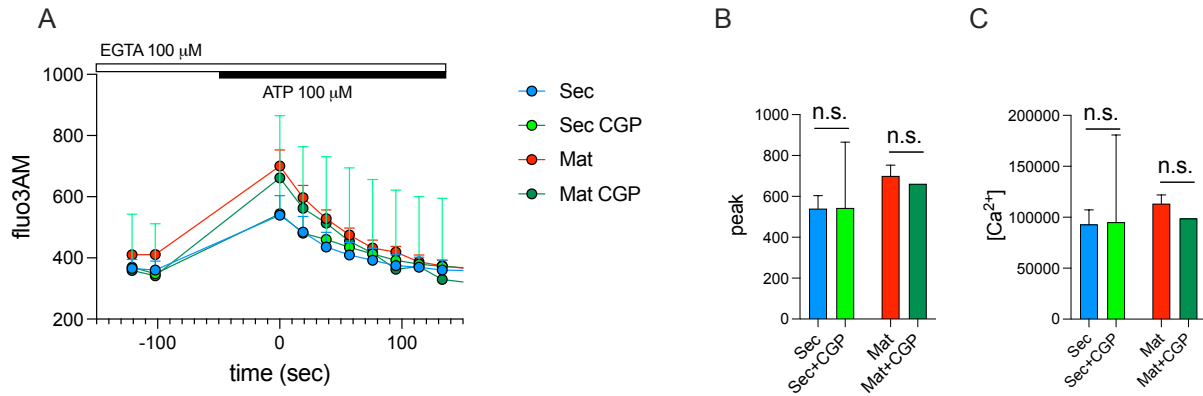

**Figure S2: The NCLX inhibitor CGP-37157 does not alter the cytosolic Ca<sup>2+</sup> level in enamel cells.** **A)** Original traces showing cytosolic Ca<sup>2+</sup> level in secretory and maturation stage ameloblasts loaded with the cytosolic Ca<sup>2+</sup> indicator fluo3AM (1  $\mu$ M) in the presence/absence of the NCLX inhibitor CGP-37157 (10  $\mu$ M). **B-C)** Quantification of the Ca<sup>2+</sup> peak and area under the curve. Data represent the mean  $\pm$  SEM of 3 independent experiments (n = 4 animals), 4 wells for each condition with 20-50 cells per field. Data were analyzed by one-way ANOVA. n.s., non-significant.
